# Supplementary material for: Development of Au–Pd@UiO-66-on-ZIF-L/CC as a self-supported electrochemical sensor for in situ monitoring of cellular hydrogen peroxide
Source: Royal Society of Chemistry journal article supplement (doi:10.1039/d1tb01120k), 2021-01-01
Supplement: d1tb01120k1.pdf [file d1tb01120k1.pdf]

# **Development of Au-Pd@UiO-66-on-ZIF-L/CC as a self-supported electrochemical sensor for in situ monitoring of cellular hydrogen peroxide**

Jilin Zheng,<sup>a</sup> Peng Zhao,<sup>a</sup> Shiyong Zhou,<sup>a</sup> Sha Chen,<sup>a</sup> Yi Liang,<sup>a</sup> Fengchun Tian,<sup>b</sup> Jun Zhou,<sup>\*a,c</sup> Danqun Huo,<sup>\*a,b</sup> Changjun Hou<sup>\*a,d</sup>

<sup>a</sup> Key Laboratory of Biorheological Science and Technology of Ministry of Education, State and Local Joint Engineering Laboratory for Vascular Implants, Bioengineering College of Chongqing University, Chongqing 400044, P.R. China

<sup>b</sup> Chongqing Key Laboratory of Bio-perception & Intelligent Information Processing, School of Microelectronics and Communication Engineering, Chongqing University, Chongqing, 400044, P.R. China

<sup>c</sup> National Engineering Research Center of Solid-State Brewing, Luzhou Laojiao Group Co. Ltd., Luzhou 646000, P.R. China

<sup>d</sup> National Facility for Translational Medicine, Shanghai Jiao Tong University, Shanghai, 200240, P.R. China

\*Corresponding author: [598551889@qq.com](mailto:598551889@qq.com); [huodq@cqu.edu.cn](mailto:huodq@cqu.edu.cn); [houcj@cqu.edu.cn](mailto:houcj@cqu.edu.cn)

## Results and Discussion

### S1.1. Characterization

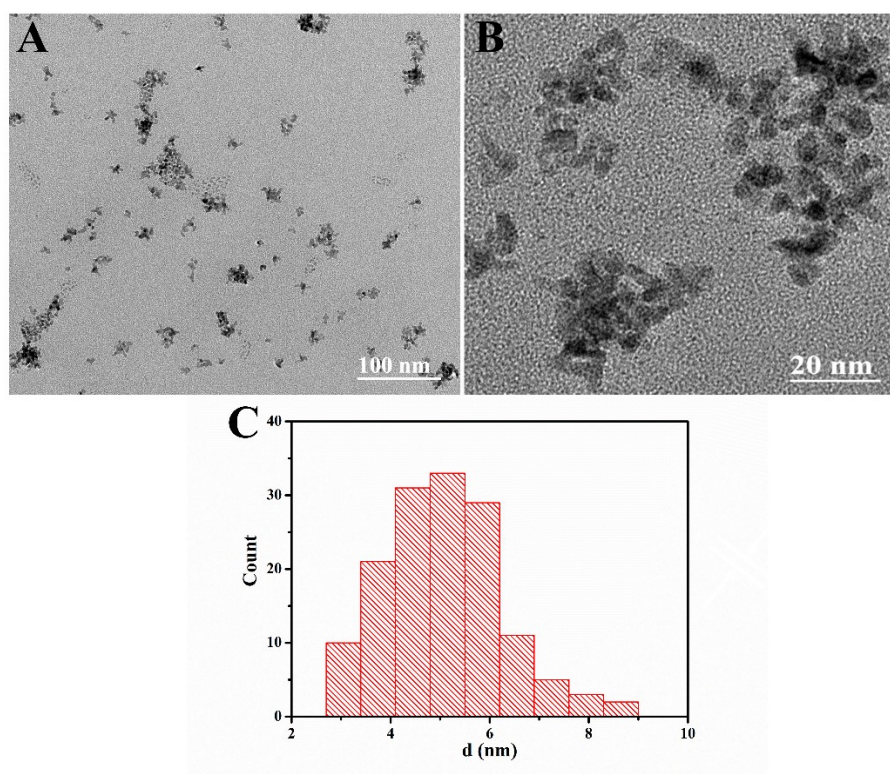

**Fig. S1** (A and B) Transmission electron micrographs of Pd nanoparticles alone, and (C) Corresponding size histogram.

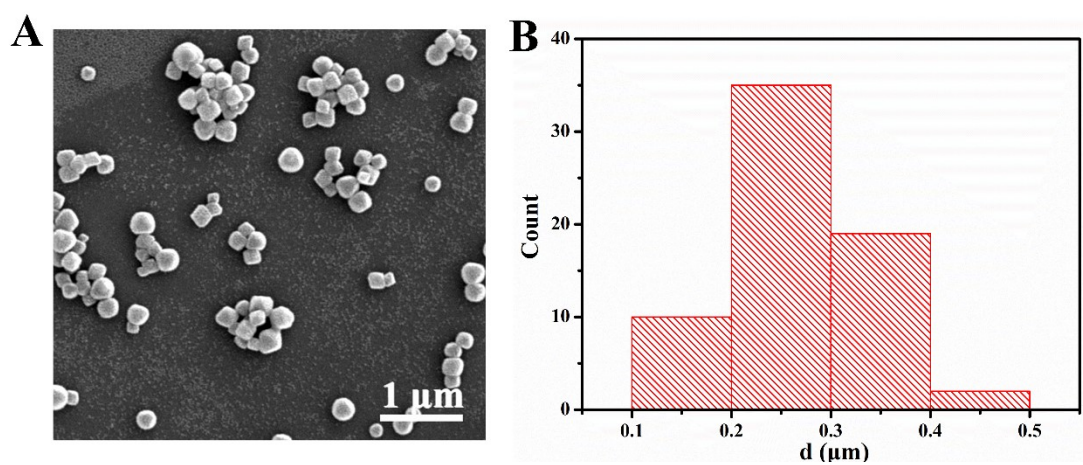

**Fig. S2** (A) Field electron scanning electron micrograph of UiO-66, and (B) Corresponding size histogram.

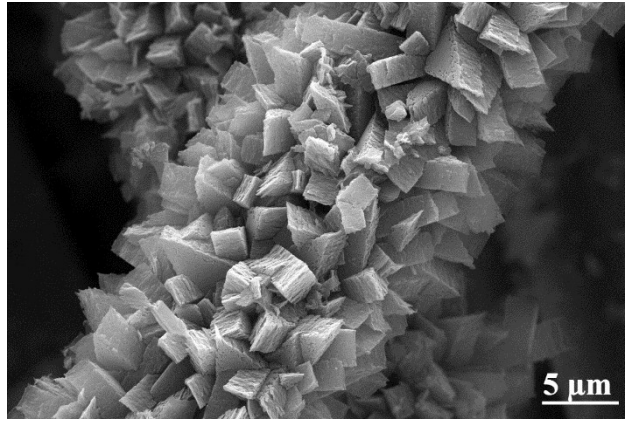

**Fig. S3** Field emission scanning electron micrograph of ZIF-L/CC.

### **S1.2. Calculation method**

For a reversible process (T=298K), the Randle Sevcik equation can be expressed as follows <sup>1,2</sup>:

$$I_p = (2.69 \times 10^5) n^{\frac{3}{2}} A D^{\frac{1}{2}} C v^{\frac{1}{2}}$$

where  $I_p$  is the anodic peak current,  $n$  is the number of transition electrons of  $[\text{Fe}(\text{CN})_6]^{3-/4-}$  ( $=1$ ),  $A$  is the active surface area ( $\text{cm}^2$ ),  $D$  refers to the diffusion coefficient ( $D=6.7 \pm 0.02 \text{ cm}^2 \text{ s}^{-1}$ ),  $C$  means the concentration of  $\text{K}_3\text{Fe}(\text{CN})_6$  (5 mM),  $v$  is the scan rate ( $50 \text{ mV s}^{-1}$ ).

### **S1.3. Sensitivity and Detection Limit Calculation**

The sensitivity and detection limit of Au-Pd@UiO-66-on-ZIF-L/CC can be calculated by the following equation <sup>2,3</sup>:

$$\text{Sensitivity} = \frac{k}{A}$$

$$\text{Detection limit} = \frac{S}{N} \cdot \frac{\delta}{k}$$

where  $k$  refers to the slope of the regression line,  $A$  means the area of Au-Pd@UiO-66-on-ZIF-L/CC,  $S/N$  is the signal-to-noise ratio of electrochemical station and usually the

value is 3,  $\delta$  is the standard deviation of response.

**Table S1.** Compared with other non-enzymatic electrochemical sensors for H<sub>2</sub>O<sub>2</sub> detection.

| electrode materials <sup>a</sup>      | linear range ( $\mu$ M)     | detection limit ( $\mu$ M) | references |
|---------------------------------------|-----------------------------|----------------------------|------------|
| Au/Fe <sub>3</sub> O <sub>4</sub>     | 1– 1000                     | 0.108                      | 2          |
| Co-N/CNT                              | $5 \times 10^{-5}$ – 50,000 | 0.0324                     | 3          |
| Pt@UiO-66                             | 5 – 14,750                  | 3.06                       | 4          |
| Ag/H-ZIF-67                           | 5–7000, 7000 – 67,000       | 1.1                        | 5          |
| Co@MOF-808                            | 10 – 450                    | 1.3                        | 6          |
| ZnMn <sub>2</sub> O <sub>4</sub> @rGO | 0.03 – 6000                 | 0.012                      | 7          |
| PB NPs/Ti <sub>3</sub> C <sub>2</sub> | 0.6 – 63.6, 63.6 – 254      | 0.20                       | 8          |
| CoFe-PBA/Co-ZIF                       | 200 – 6000                  | 0.0108                     | 9          |
| Pd@UiO-66-on-ZIF-L                    | 1 – 19,600                  | 0.0212                     | This work  |

<sup>a</sup> N/CNT: N-doped carbon nanotube; rGO: reduced graphene oxide; PB: Prussian blue; NPs: nanoparticles; PBA: Prussian blue analogue.

## References

1. J. Zhou, Y. Zhao, J. Bao, D. Huo, H. Fa, X. Shen and C. Hou, *Electrochim. Acta*, 2017, **250**, 152-158.
2. H. Liu, Q. Chen, X. Cheng, Y. Wang, Y. Zhang and G. Fan, *Sens. Actuators, B*, 2020, **314**.
3. Z. Li, R. Liu, C. Tang, Z. Wang, X. Chen, Y. Jiang, C. Wang, Y. Yuan, W. Wang, D. Wang, S. Chen, X. Zhang, Q. Zhang and J. Jiang, *Small*, 2020, **16**.
4. Z. Xu, L. Yang and C. Xu, *Anal. Chem.*, 2015, **87**, 3438-3444.
5. D. Sun, D. Yang, P. Wei, B. Liu, Z. Chen, L. Zhang and J. Lu, *ACS Appl. Mater. Interfaces*, 2020, **12**, 41960-41968.
6. Y.-S. Chang, J.-H. Li, Y.-C. Chen, W. H. Ho, Y.-D. Song and C.-W. Kung, *Electrochim. Acta*, 2020, **347**.
7. Y. Li, K. Huan, D. Deng, L. Tang, J. Wang and L. Luo, *ACS Appl. Mater. Interfaces*, 2020, **12**, 3430-3437.
8. Y. Dang, X. Guan, Y. Zhou, C. Hao, Y. Zhang, S. Chen, Y. Ma, Y. Bai, Y. Gong and Y. Gao, *Sens. Actuators, B*, 2020, **319**.
9. C. Chen, D. Xiong, M. Gu, C. Lu, F.-Y. Yi and X. Ma, *ACS Appl. Mater. Interfaces*, 2020, **12**, 35365-35374.
